# Supplementary material
Source: Springer Nature journal article supplement (https://www.springermedizin.de/resource/supplementary/13063_2012_1321_MOESM2_ESM.pdf/9619406)

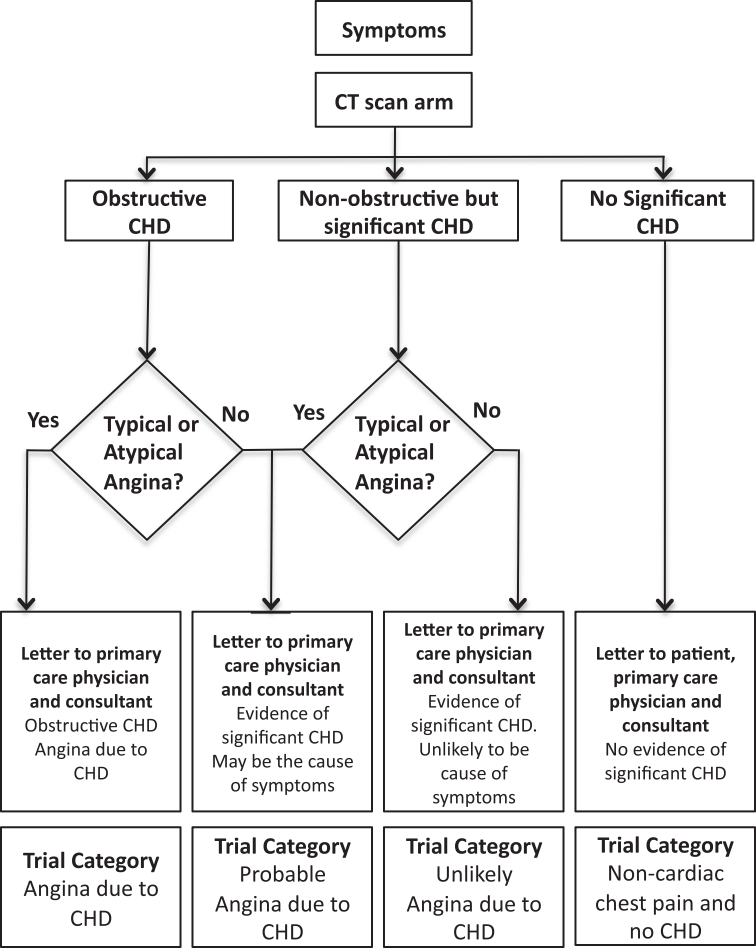

Supplement: MOESM2 [file 9619406]
